# Supplementary material for: Enhanced sensing of mercuric ions based on dinucleotide-functionalized silver nanoparticles
Source: Royal Society of Chemistry journal article supplement (doi:10.1039/c6ay02306a), 2016-01-01
Supplement: c6ay02306a1.pdf [file c6ay02306a1.pdf]

## Supplementary Figures

### **Enhanced sensing of mercuric ions based on dinucleotide functionalized silver nanoparticles**

Govindhan Maduraiveeran\*<sup>a</sup> and Ramasamy Ramaraj\*<sup>b</sup>

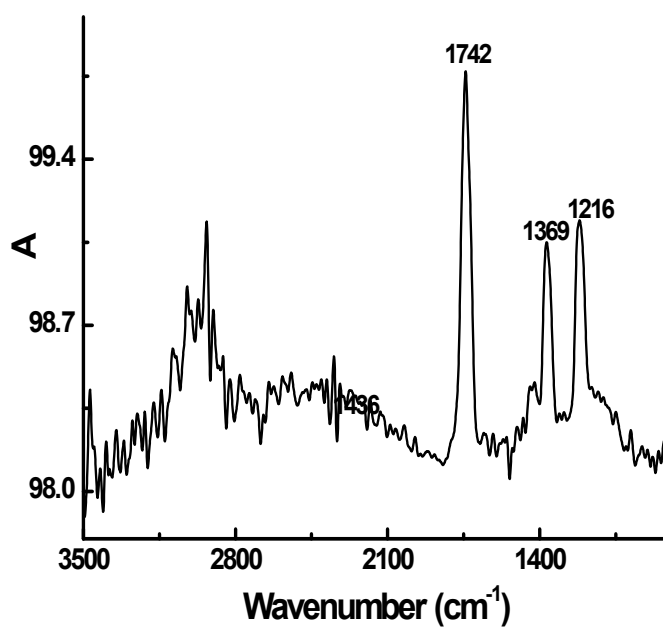

**Fig. S1.** ATR-FTIR spectrum of silver nanoparticles.

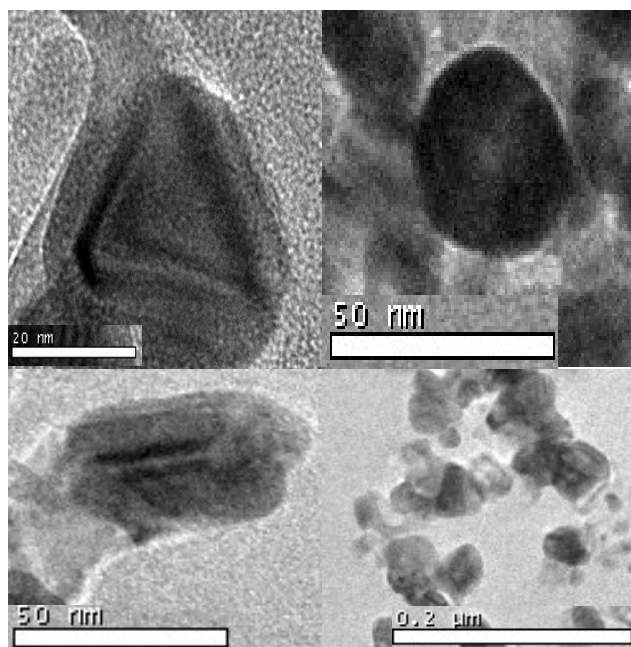

**Fig. S2.** HRTEM images of silver nanoparticles.
